# Supplementary material for: Mesenchymal stem cells promote osteosarcoma cell survival and drug resistance through activation of STAT3
Source: PubMed Central journal article supplement (PMC5217018; doi:10.18632/oncotarget.10219), 2016-06-22
Supplement: oncotarget-07-48296-s001.pdf [file oncotarget-07-48296-s001.pdf]

## Mesenchymal stem cells promote osteosarcoma cell survival and drug resistance through activation of STAT3

### SUPPLEMENTARY TABLE AND FIGURES

Supplementary Table S1: Drugs sensitivity was tested by ATP tumor chemosensitivity assay (ATP-TCA)

| Patients  |    | Sex | Age | IC50(%) | IC90(%) |
|-----------|----|-----|-----|---------|---------|
| Sensitive | 1  | F   | 15  | 5.6     | 88.9    |
|           | 2  | F   | 17  | 20.6    | 149.7   |
|           | 3  | M   | 20  | 13.5    | 133.5   |
|           | 4  | M   | 23  | 30.9    | 89.3    |
|           | 5  | M   | 24  | 23.5    | 128.5   |
|           | 6  | F   | 38  | 4.8     | 77.4    |
|           | 7  | F   | 51  | 10.8    | 95.3    |
|           | 8  | M   | 58  | 14.4    | 57.7    |
|           | 9  | M   | 64  | 9.3     | 54.39   |
| Resistant | 1  | M   | 15  | 70.6    | 179.5   |
|           | 2  | M   | 16  | 37.6    | 145.3   |
|           | 3  | F   | 19  | 57.4    | 141.2   |
|           | 4  | M   | 22  | 28.5    | 138.7   |
|           | 5  | M   | 23  | 39.2    | 115.1   |
|           | 6  | F   | 27  | 65.3    | 125.2   |
|           | 7  | F   | 27  | 34.6    | 162.7   |
|           | 8  | M   | 36  | 46.4    | 119.5   |
|           | 9  | M   | 53  | 50.3    | 130.6   |
|           | 10 | M   | 60  | 28.37   | 105.7   |
|           | 11 | F   | 63  | 36.5    | 143.2   |
|           | 12 | F   | 63  | 41.2    | 162.1   |
|           | 13 | F   | 66  | 26.3    | 109.2   |
|           | 14 | M   | 68  | 37.3    | 127.2   |

Tumor specimens (1-2 cm<sup>3</sup>) were taken during primary surgery. The chemosensitivity was determined by the ATP-TCA kit (DCS Innovative Diagnostik Systeme, Hamburg, Germany) according to the manufacture's instructions. Sensitive: IC50<25% TDC or IC90<100% TDC; Resistant: IC50>25% test drug concentration (TDC) and IC90>100% TDC.

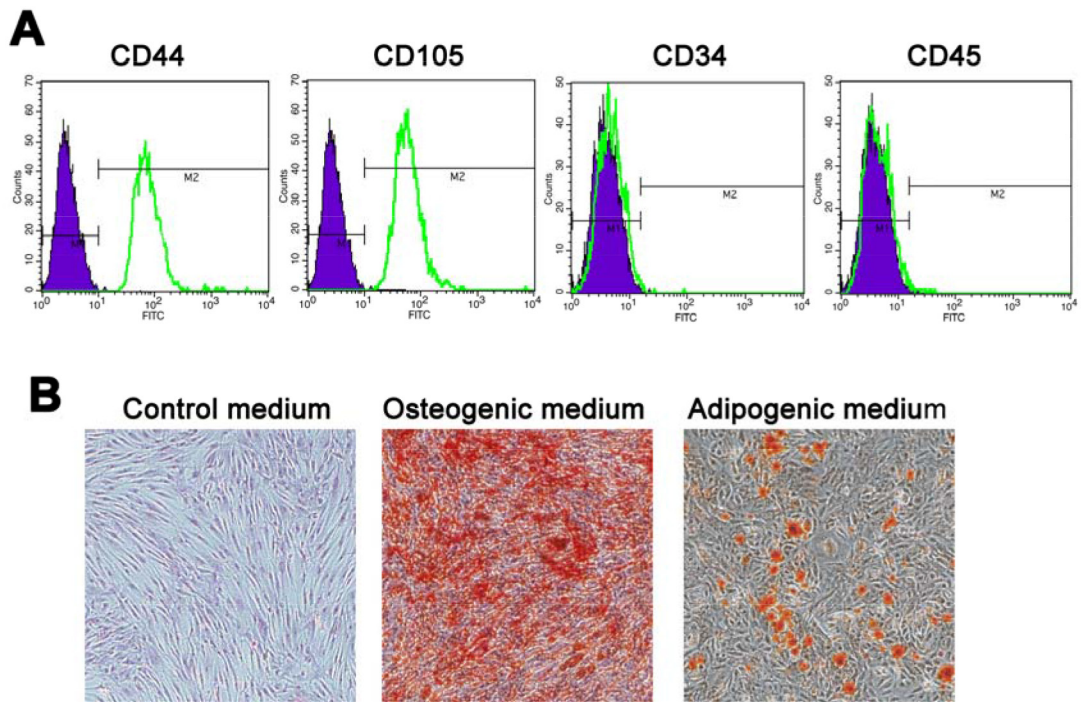

**Supplementary Figure S1: Characterization of MSCs.** **A.** Expression of cell surface markers in MSCs. The filled histogram curves represents the autofluorescent control. The open histogram curves show the staining with respective primary and secondary antibodies. **B.** Left: undifferentiated MSCs; Middle: Osteogenic differentiation of MSCs staining with Alizarin Red S at week 2; Right: Adipogenic differentiation of MSCs staining with Oil Red O at week 2.

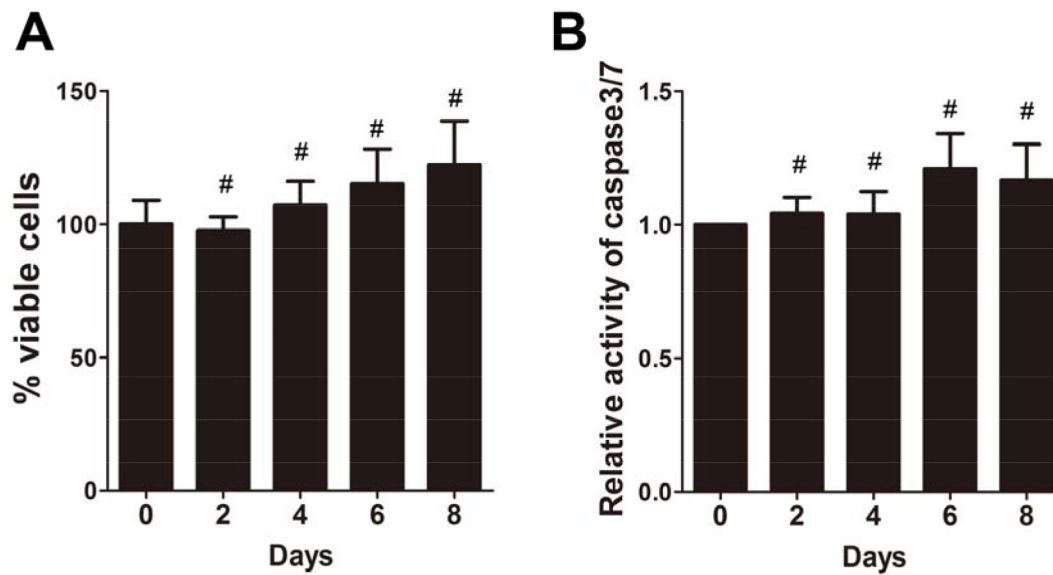

**Supplementary Figure S2: 1% FBS has no effect on the proliferation and apoptosis of tumor.** MSCs were cultured in DMEM containing 1% FBS for 8 days. **A.** Cell proliferation was evaluated by the CCK-8 assay. **B.** caspase 3/7 activity was examined at the indicated times. #,  $p > 0.05$ .

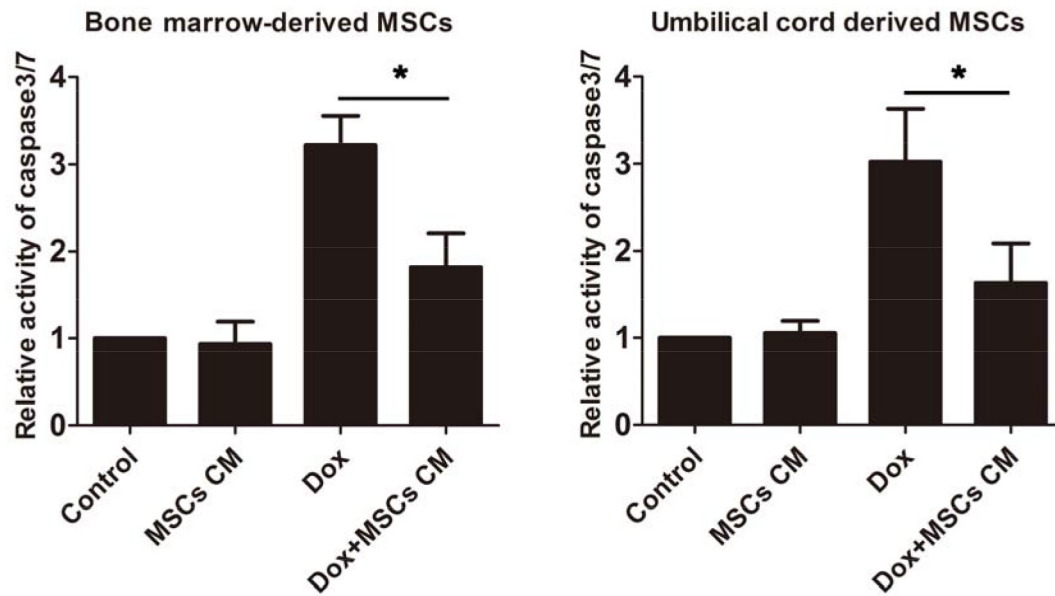

**Supplementary Figure S3: MSCs from different tissues protect Saos-2 cells from doxorubicin-induced apoptosis.** Saos-2 cells were treated with MSCs CM and/or doxorubicin for 48h, caspase 3/7 activity in the cells was detected. Left: Bone marrow-derived MSCs CM. Right: Umbilical cord derived MSCs CM. The human umbilical cord derived MSCs were purchased from Chinese Academy of Sciences, Shanghai, China. \*,  $p < 0.05$ .

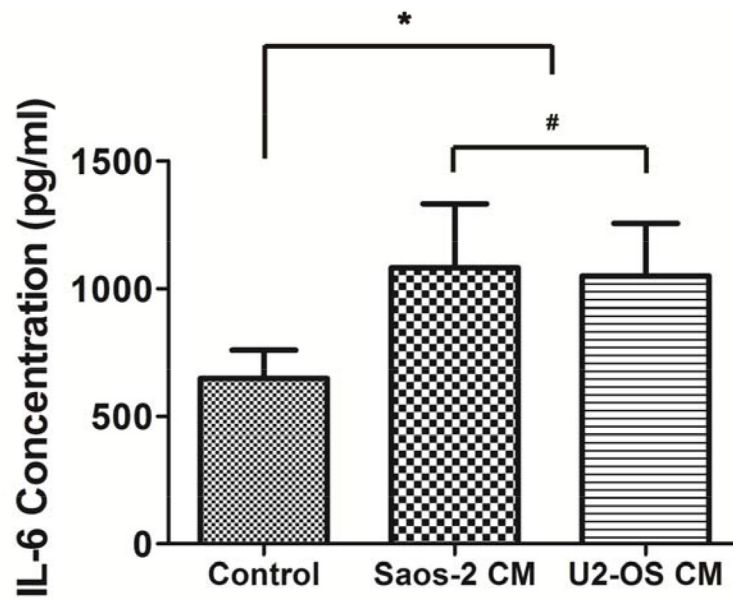

**Supplementary Figure S4: The osteosarcoma cells promote the IL-6 expression in MSCs.** MSCs were incubated in Saos-2 CM or U2-OS CM for 48h. Then the medium was replaced with DMEM without FBS and cultured for another 24h. The IL-6 concentration in the MSCs supernatant was detected by ELISA. \*,  $p < 0.05$ ; #,  $p > 0.05$ .
